# Supplementary material for: Unravelling the molecular control of calvarial suture fusion in children with craniosynostosis
Source: PubMed Central journal article supplement (PMC2222648; doi:10.1186/1471-2164-8-458), 2007-12-12

RNA digestion plot

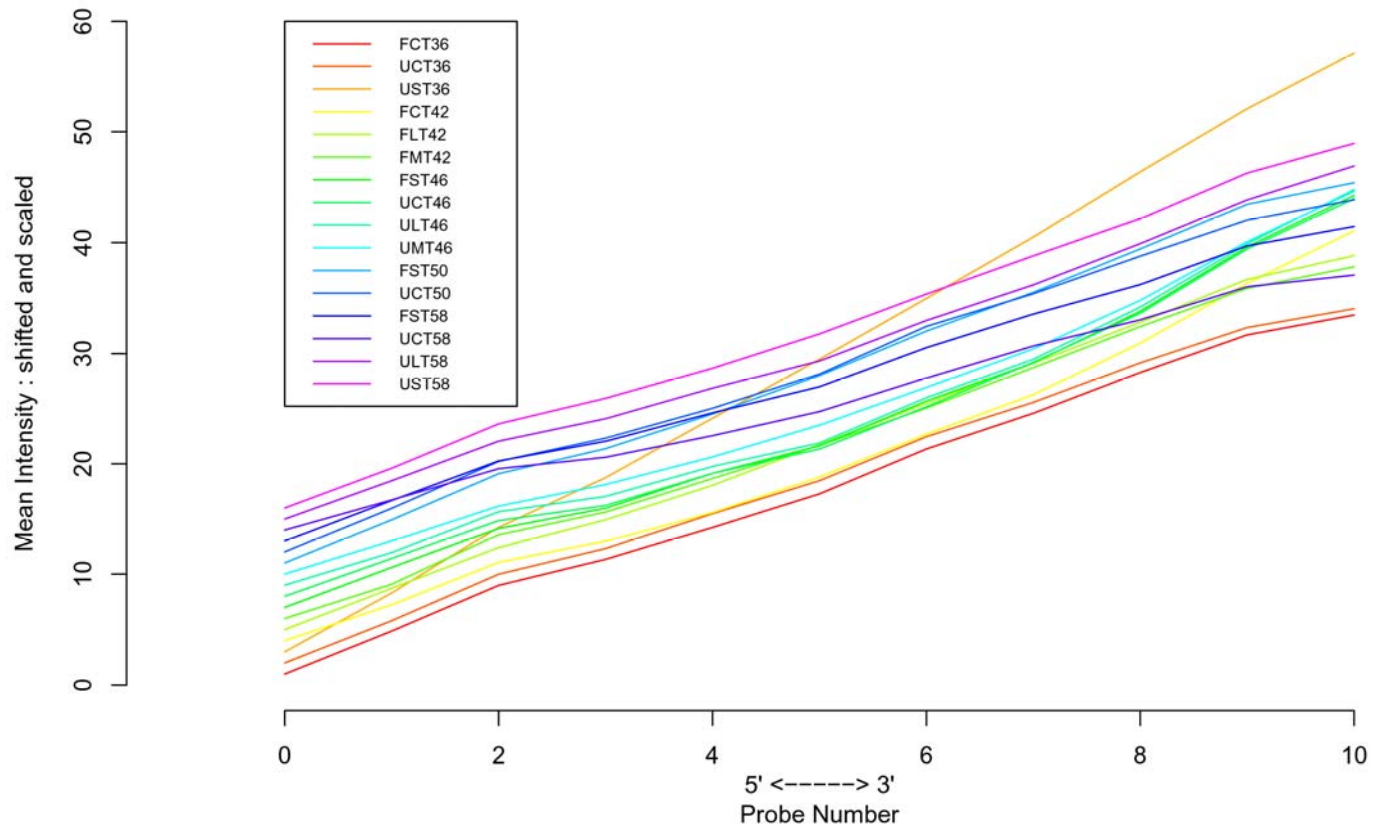

Supplement: 1471-2164-8-458-S1.pdf [file 1471-2164-8-458-S1.pdf]
