# Supplementary material for: Unravelling the molecular control of calvarial suture fusion in children with craniosynostosis
Source: PubMed Central journal article supplement (PMC2222648; doi:10.1186/1471-2164-8-458), 2007-12-12
Supplement: 1471-2164-8-458-S7.pdf [file 1471-2164-8-458-S7.pdf]

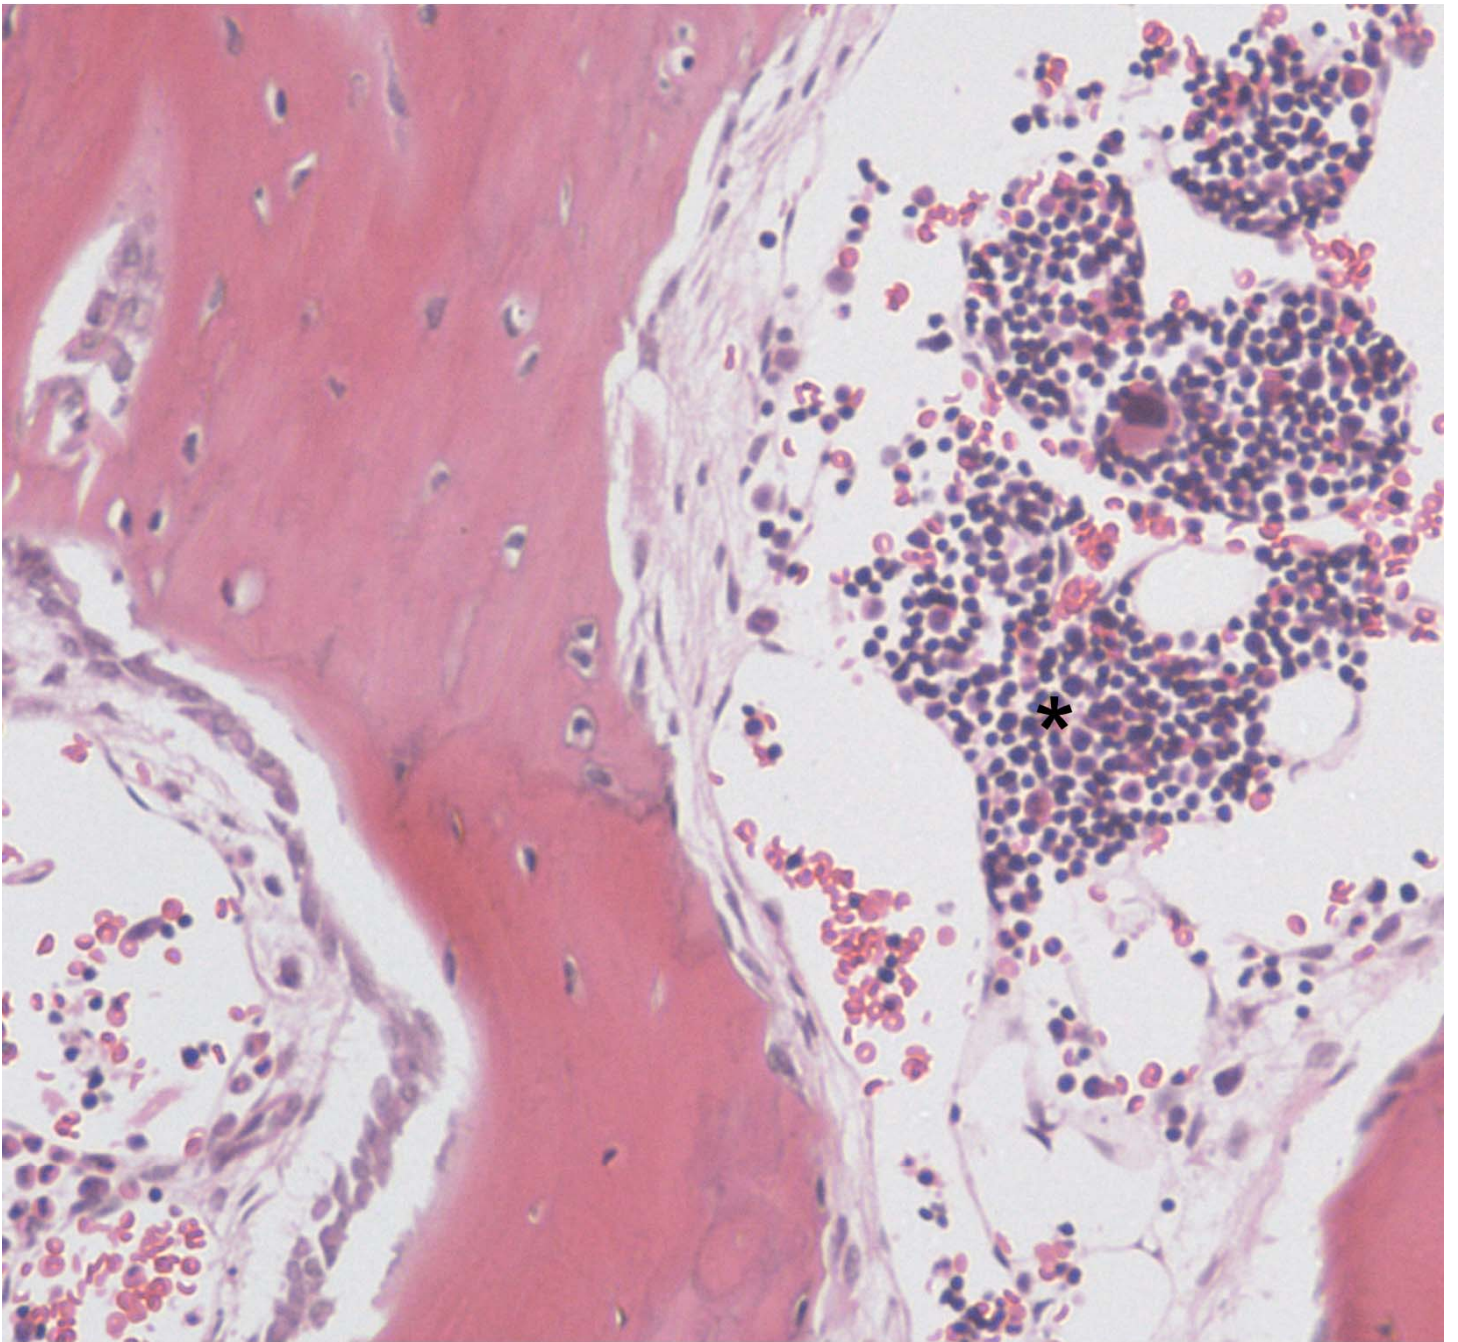

**Additional file 7.** A large number of white blood cells were observed in the calvarial tissue . The majority of cells appear as lymphocytes (\*).
