# Supplementary material for: Unravelling the molecular control of calvarial suture fusion in children with craniosynostosis
Source: PubMed Central journal article supplement (PMC2222648; doi:10.1186/1471-2164-8-458), 2007-12-12
Supplement: 1471-2164-8-458-S12.pdf [file 1471-2164-8-458-S12.pdf]

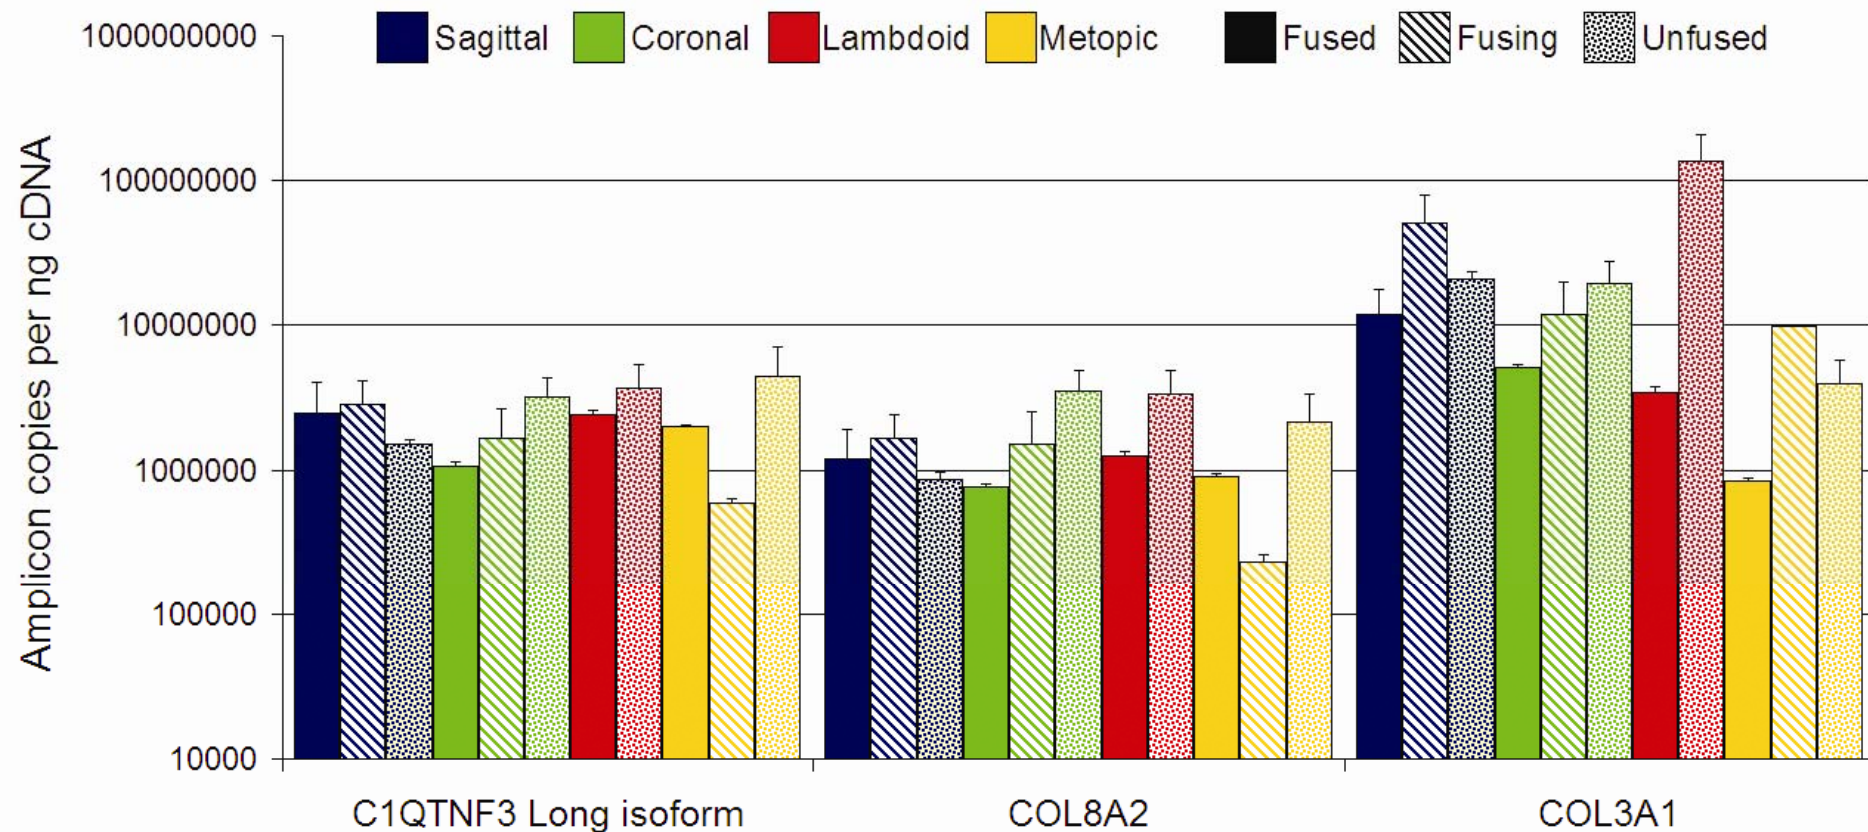

**Additional file 12.** qRT-PCR results for the additional genes not shown in Figure 6A. The long isoform of *C1QTNF3* had limited to no differential expression between unfused, fusing, and fused suture from the different sites and was therefore not the highly significantly differentially expressed isoform. *COL8A2* and *COL3A1* had increased expression in unfused compared to fused sutures, except in the sagittal suture.
